# Supplementary material for: Conjugated polydiacetylenes bearing quaternary ammonium groups as a dual colorimetric and fluorescent sensor for ATP
Source: Royal Society of Chemistry journal article supplement (doi:10.1039/c2jm14996f), 2012-01-01
Supplement: c2jm14996f.pdf [file c2jm14996f.pdf]

# Conjugated Polydiacetylenes Bearing Quaternary Ammonium Groups as a Dual Colorimetric and Fluorescent Sensor for ATP

*Hyeryeong Jeon<sup>a</sup>, Songyi Lee<sup>b</sup>, Yinhua Li<sup>a</sup>, Sungsu Park<sup>a</sup> and Juyoung Yoon<sup>\*a,b</sup>*

<sup>a</sup>Department of Chemistry and Nano Science, Ewha Womans University, Seoul, 120-750, Korea; <sup>b</sup>Department of Bioinspired Science (WCU), Ewha Womans University, Seoul, 120-750, Korea

[jyoon@ewha.ac.kr](mailto:jyoon@ewha.ac.kr)

|                                                                                           |         |
|-------------------------------------------------------------------------------------------|---------|
| <b>Experimental Section</b> .....                                                         | S2 page |
| Fig. S1. $^1\text{H}$ NMR (300 MHz) of compound PCDA-DMEDA in $\text{CDCl}_3$ .....       | S3 page |
| Fig. S2 $^{13}\text{C}$ NMR (62.5MHz) of compound PCDA-DMEDA in $\text{CDCl}_3$ .....     | S3page  |
| Fig. S3. $^1\text{H}$ NMR (300 MHz) of compound PCDA-TMEDA in $\text{CDCl}_3$ .....       | S4 page |
| Fig. S4 $^{13}\text{C}$ NMR (62.5MHz) of compound PCDA-TMEDA in $\text{CDCl}_3$ .....     | S4 page |
| Fig. S5 Dynamic Light Scattering (DLS) of PDA <b>1</b> and after addition of ATP<br>..... | S5 page |

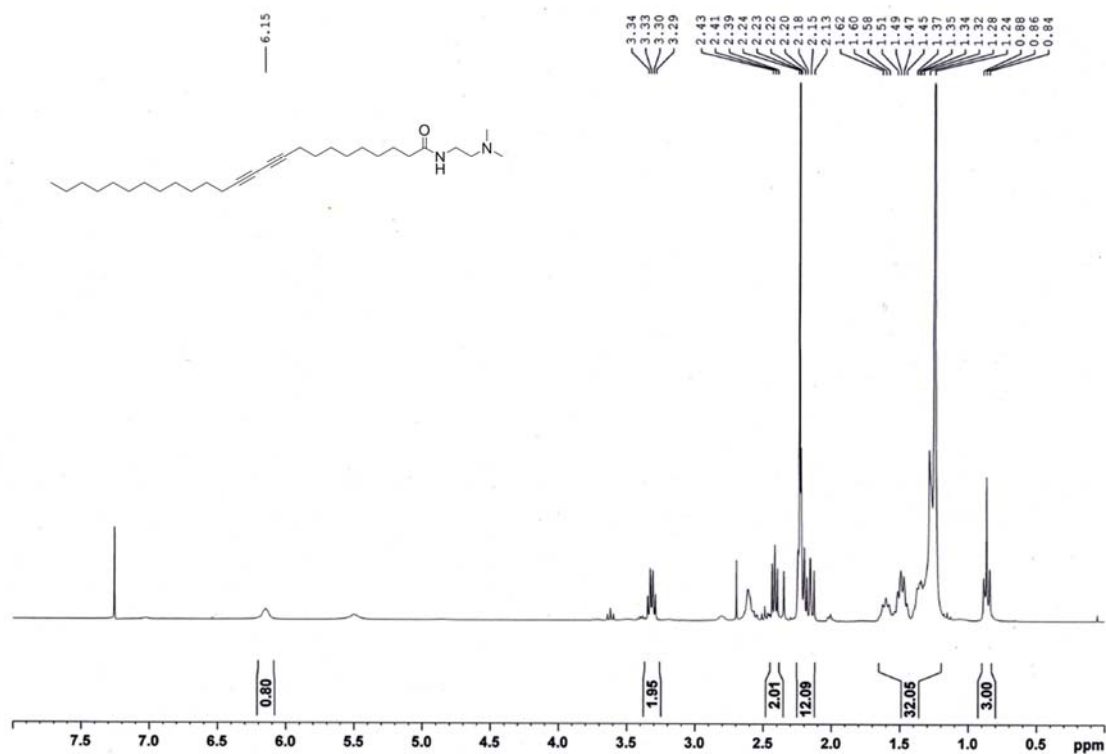

**Figure S1.** <sup>1</sup>H NMR (300 MHz) of compound **PCDA-DMEDA** in CDCl<sub>3</sub>.

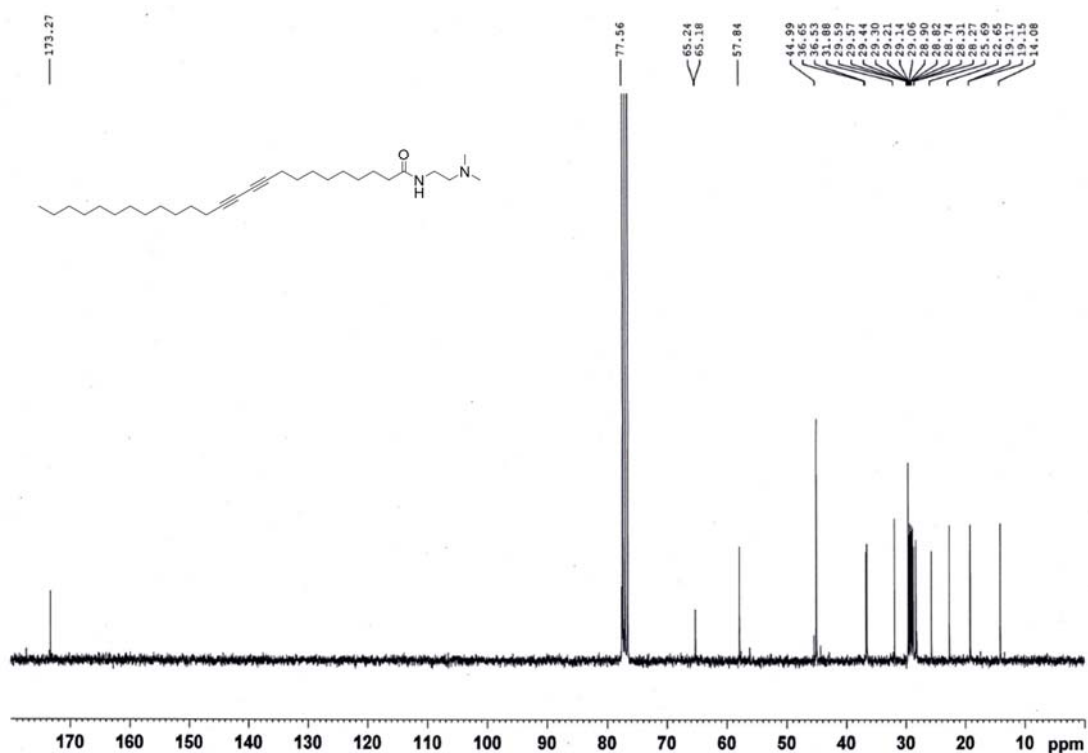

**Figure S2.** <sup>13</sup>C NMR (300 MHz) of compound **PCDA-DMEDA** in CDCl<sub>3</sub>.

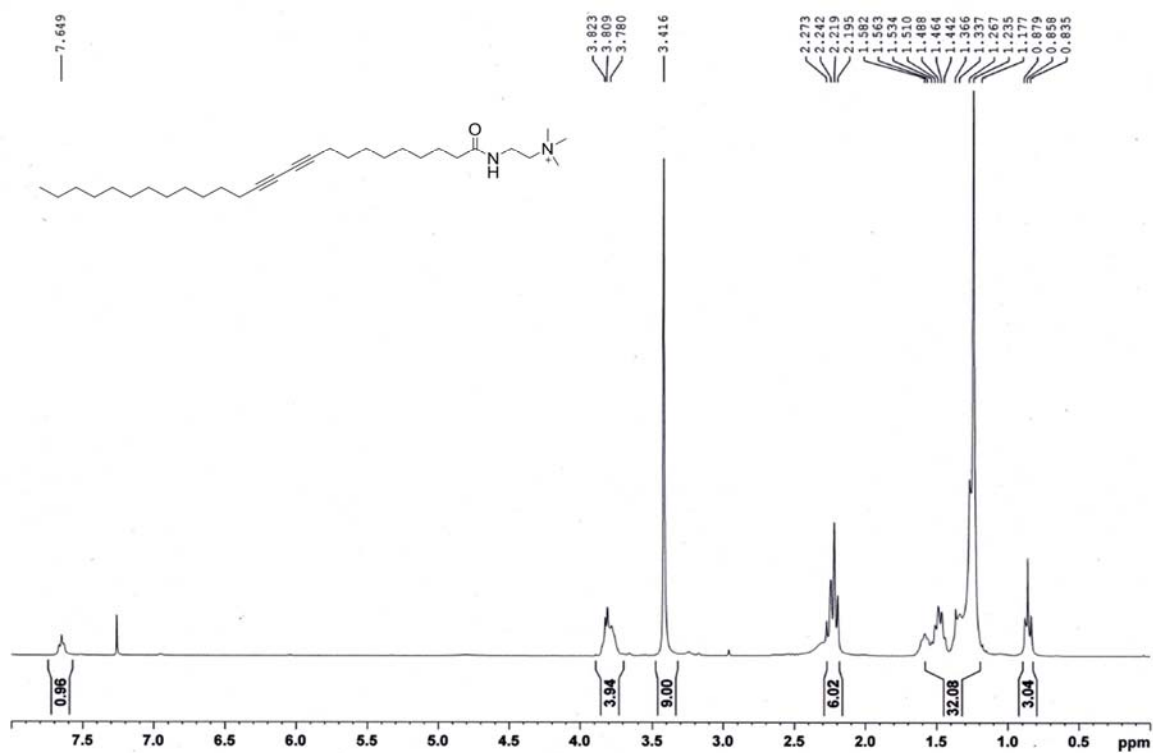

**Figure S3.** <sup>1</sup>H NMR (300 MHz) of compound **PCDA-TMEDA** in CDCl<sub>3</sub>.

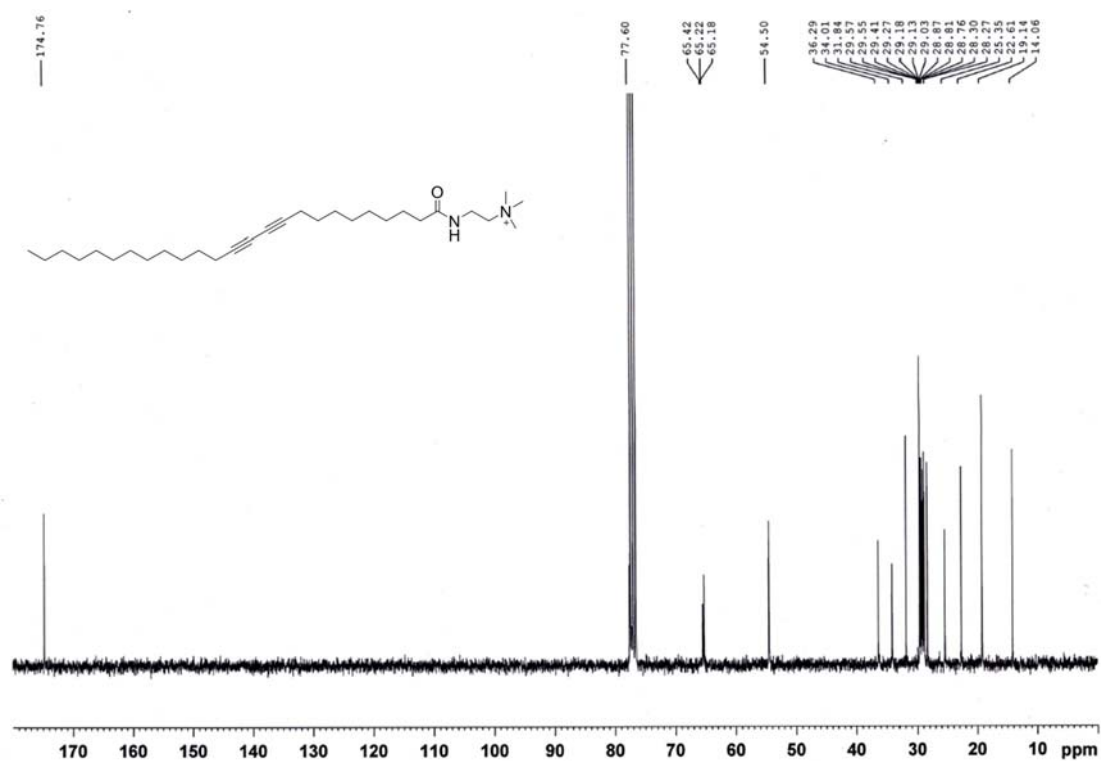

**Figure S4.** <sup>13</sup>C NMR (300 MHz) of compound **PCDA-TMEDA** in CDCl<sub>3</sub>.

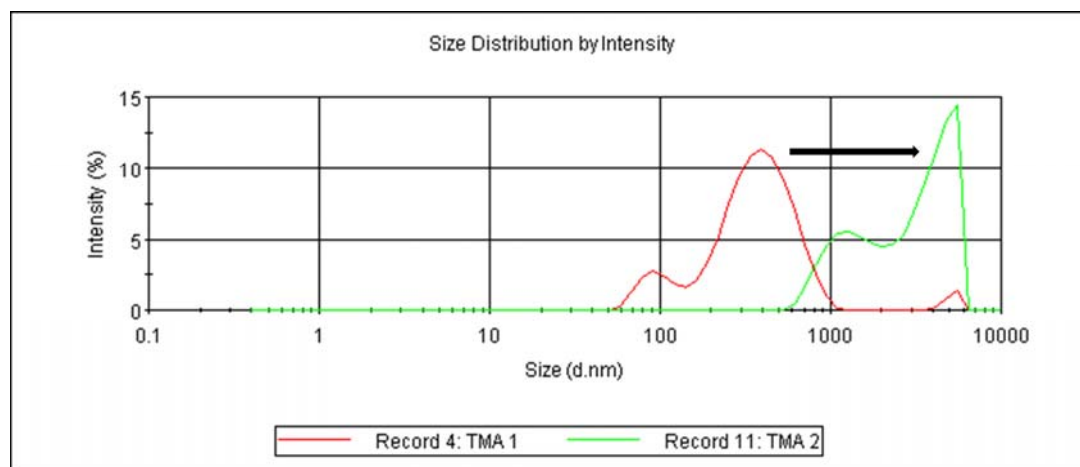

**Figure S5.** The mean size distribution of 100 $\mu$ M PDA **1** in HEPES (10mM, pH 7.0) after 254 nm UV irradiation, and after addition of 50 $\mu$ M of ATP at 25  $^{\circ}$ C.
